# Supplementary material
Source: PubMed Central journal article supplement (PMC4152370)
Supplement: NIHMS613924-supplement-Supplemental_Data.pdf [file NIHMS613924-supplement-Supplemental_Data.pdf]

## Supplementary Online Content

Lipska KJ, Ross JS, Wang Y, et al. National trends in US hospital admissions for hyperglycemia and hypoglycemia among Medicare beneficiaries, 1999 to 2011. *JAMA Intern Med*. Published online May 17, 2014. doi:10.1001/jamainternmed.2014.1824.

**eFigure.** ICD-9 codes used to identify hospital admissions for hyperglycemia and hypoglycemia

**eTable 1.** ICD-9 codes used to identify hospital admissions for hyperglycemia and hypoglycemia

**eTable 2.** Observed rates of hospital admissions for hyperglycemia and hypoglycemia per 100,000 person-years, 1999 to 2011

**eTable 3.** Observed rates of beneficiaries hospitalized for hyperglycemia and hypoglycemia per 100,000 person-years, 1999 to 2011

This supplementary material has been provided by the authors to give readers additional information about their work.

eFigure 1: Trends in overall and longer (>2 days duration) hospitalizations for hyperglycemia and hypoglycemia, 1999-2011

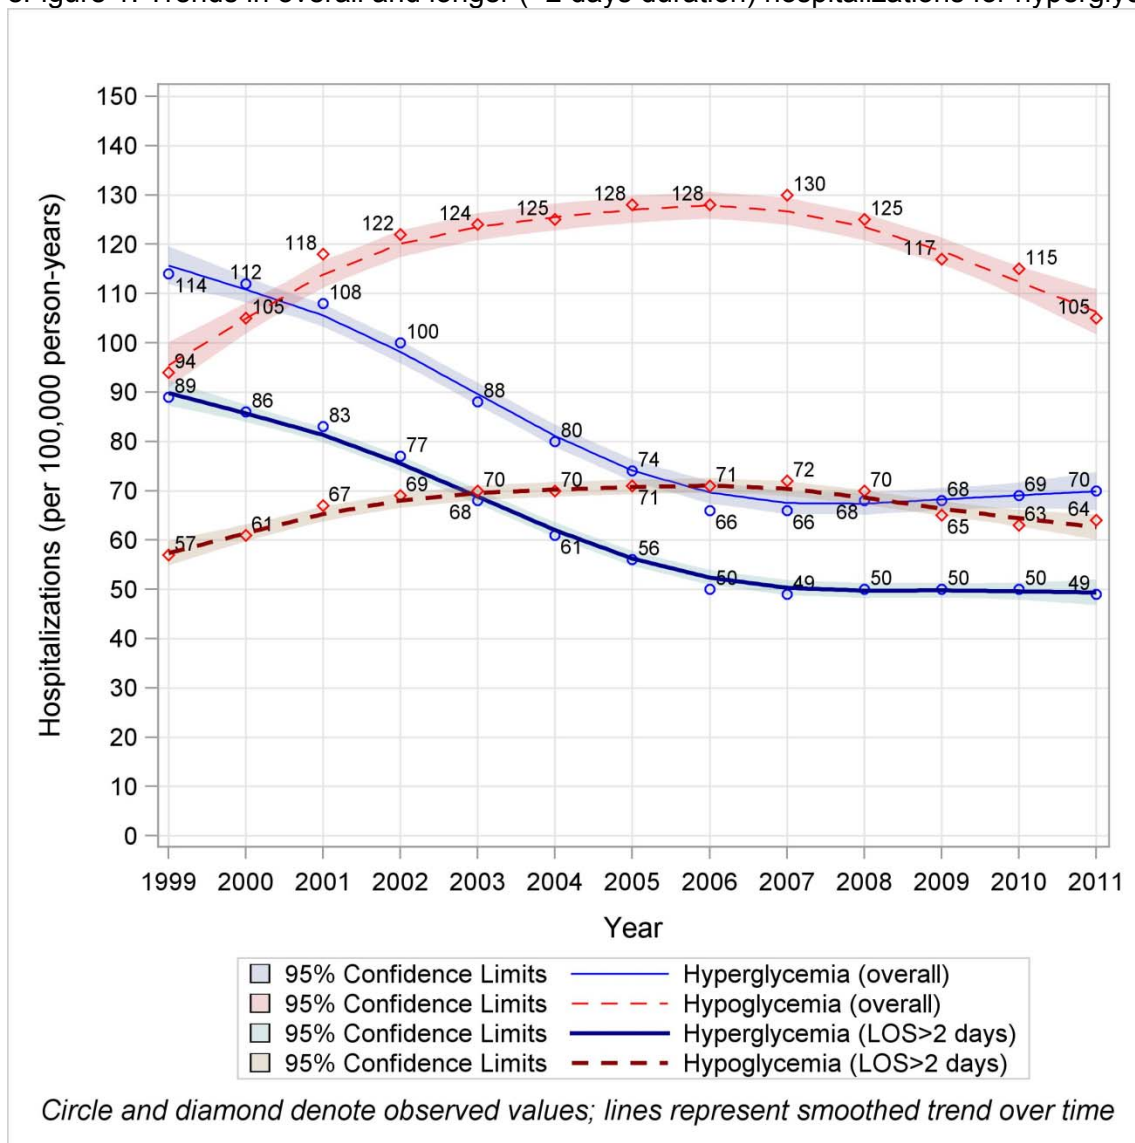

eTable 1: ICD-9 codes used to identify hospital admissions for hyperglycemia and hypoglycemia

|                                                                                                             | Principal Discharge<br>Diagnosis<br>ICD-9 Code |
|-------------------------------------------------------------------------------------------------------------|------------------------------------------------|
| <b>Hyperglycemia</b>                                                                                        |                                                |
| Diabetes type 2 without complications, uncontrolled                                                         | 250.02                                         |
| Diabetes type 1 without complications, uncontrolled                                                         | 250.03                                         |
| Diabetic ketoacidosis                                                                                       | 250.1                                          |
| Diabetes with hyperosmolarity                                                                               | 250.2                                          |
| Diabetes with other coma (diabetic coma with ketoacidosis,<br>diabetic hypoglycemic coma, insulin coma NOS) | 250.3                                          |
| <b>Hypoglycemia</b>                                                                                         |                                                |
| Hypoglycemic coma                                                                                           | 251.0*                                         |
| Other specified hypoglycemia                                                                                | 251.1*                                         |
| Hypoglycemia unspecified                                                                                    | 251.2*                                         |
| Poisoning by insulins or antidiabetic agents                                                                | 962.3*                                         |
| Diabetes with other manifestations (diabetic hypoglycemia NOS or<br>hypoglycemic shock NOS)                 | 250.8**                                        |

\* We specified that these principal discharge diagnoses had to occur in conjunction with a secondary ICD-9 code for diabetes (250.xx).

\*\* For the principal discharge diagnosis of 250.8, we excluded admissions with the following secondary ICD-9 codes following a validated algorithm:<sup>25</sup> 259.8, 272.7, 681.xx, 682.xx, 686.9x, 707.xx, 709.3, 730.0-730.2, or 731.8.

eTable 2: Observed rates of hospital admissions for hyperglycemia and hypoglycemia per 100,000 person-years, 1999 to 2011

|                             | 1999 | 2000 | 2001 | 2002 | 2003 | 2004 | 2005 | 2006 | 2007 | 2008 | 2009 | 2010 | 2011 |
|-----------------------------|------|------|------|------|------|------|------|------|------|------|------|------|------|
| <b><u>Hyperglycemia</u></b> |      |      |      |      |      |      |      |      |      |      |      |      |      |
| <b>Overall</b>              | 114  | 112  | 108  | 100  | 88   | 80   | 74   | 66   | 66   | 68   | 68   | 69   | 70   |
| <b>By Age</b>               |      |      |      |      |      |      |      |      |      |      |      |      |      |
| 65-74 years                 | 97   | 97   | 93   | 89   | 79   | 73   | 69   | 63   | 63   | 64   | 65   | 66   | 67   |
| 75-84 years                 | 132  | 127  | 122  | 112  | 98   | 88   | 81   | 72   | 71   | 74   | 74   | 75   | 75   |
| ≥85 years                   | 136  | 132  | 130  | 116  | 98   | 88   | 76   | 65   | 63   | 67   | 69   | 68   | 68   |
| <b>By Sex</b>               |      |      |      |      |      |      |      |      |      |      |      |      |      |
| Female                      | 120  | 119  | 115  | 107  | 95   | 85   | 77   | 68   | 68   | 70   | 70   | 70   | 71   |
| Male                        | 105  | 102  | 97   | 91   | 80   | 73   | 70   | 63   | 63   | 65   | 67   | 68   | 69   |
| <b>By Race</b>              |      |      |      |      |      |      |      |      |      |      |      |      |      |
| White                       | 92   | 89   | 87   | 79   | 69   | 62   | 56   | 51   | 51   | 53   | 54   | 54   | 55   |
| Black                       | 335  | 332  | 307  | 299  | 264  | 248  | 236  | 216  | 214  | 214  | 218  | 216  | 217  |
| Other                       | 160  | 162  | 163  | 152  | 135  | 127  | 118  | 96   | 93   | 93   | 87   | 87   | 82   |
| <b><u>Hypoglycemia</u></b>  |      |      |      |      |      |      |      |      |      |      |      |      |      |
| <b>Overall</b>              | 94   | 105  | 118  | 122  | 124  | 125  | 128  | 128  | 130  | 125  | 117  | 115  | 105  |
| <b>By Age</b>               |      |      |      |      |      |      |      |      |      |      |      |      |      |
| 65-74 years                 | 70   | 76   | 86   | 88   | 90   | 89   | 90   | 90   | 90   | 85   | 78   | 77   | 72   |
| 75-84 years                 | 121  | 136  | 151  | 159  | 161  | 162  | 169  | 168  | 172  | 166  | 158  | 153  | 141  |
| ≥85 years                   | 126  | 141  | 158  | 160  | 166  | 170  | 177  | 176  | 179  | 181  | 172  | 172  | 152  |
| <b>By Sex</b>               |      |      |      |      |      |      |      |      |      |      |      |      |      |
| Female                      | 98   | 112  | 124  | 128  | 129  | 129  | 133  | 132  | 132  | 128  | 118  | 116  | 106  |
| Male                        | 88   | 96   | 109  | 113  | 117  | 118  | 122  | 123  | 127  | 121  | 116  | 112  | 103  |
| <b>By Race</b>              |      |      |      |      |      |      |      |      |      |      |      |      |      |
| White                       | 74   | 83   | 93   | 95   | 97   | 96   | 99   | 99   | 100  | 98   | 92   | 89   | 82   |
| Black                       | 294  | 322  | 355  | 371  | 370  | 376  | 388  | 385  | 395  | 373  | 348  | 344  | 315  |
| Other                       | 129  | 157  | 177  | 194  | 194  | 206  | 213  | 214  | 210  | 195  | 169  | 171  | 144  |

eTable 3: Observed rates of beneficiaries hospitalized for hyperglycemia and hypoglycemia per 100,000 person-years, 1999 to 2011

|                             | 1999 | 2000 | 2001 | 2002 | 2003 | 2004 | 2005 | 2006 | 2007 | 2008 | 2009 | 2010 | 2011 |
|-----------------------------|------|------|------|------|------|------|------|------|------|------|------|------|------|
| <b><u>Hyperglycemia</u></b> |      |      |      |      |      |      |      |      |      |      |      |      |      |
| <b>Overall</b>              | 106  | 104  | 100  | 93   | 82   | 74   | 68   | 61   | 61   | 62   | 64   | 64   | 65   |
| <b>By Age</b>               |      |      |      |      |      |      |      |      |      |      |      |      |      |
| 65-74 years                 | 90   | 89   | 86   | 81   | 73   | 67   | 63   | 57   | 58   | 58   | 60   | 61   | 62   |
| 75-84 years                 | 123  | 118  | 113  | 104  | 91   | 82   | 75   | 67   | 66   | 69   | 69   | 70   | 70   |
| ≥85 years                   | 129  | 126  | 122  | 110  | 93   | 83   | 72   | 62   | 59   | 63   | 65   | 65   | 64   |
| <b>By Sex</b>               |      |      |      |      |      |      |      |      |      |      |      |      |      |
| Female                      | 111  | 110  | 106  | 99   | 87   | 78   | 71   | 63   | 62   | 64   | 64   | 65   | 65   |
| Male                        | 98   | 95   | 91   | 85   | 74   | 69   | 65   | 59   | 59   | 60   | 63   | 64   | 64   |
| <b>By Race</b>              |      |      |      |      |      |      |      |      |      |      |      |      |      |
| White                       | 86   | 83   | 81   | 73   | 64   | 57   | 52   | 47   | 47   | 49   | 50   | 50   | 51   |
| Black                       | 308  | 305  | 282  | 274  | 242  | 229  | 219  | 198  | 195  | 195  | 200  | 201  | 199  |
| Other                       | 148  | 151  | 152  | 141  | 126  | 119  | 110  | 90   | 87   | 87   | 82   | 84   | 78   |
| <b><u>Hypoglycemia</u></b>  |      |      |      |      |      |      |      |      |      |      |      |      |      |
| <b>Overall</b>              | 89   | 99   | 111  | 114  | 116  | 117  | 120  | 120  | 121  | 117  | 111  | 109  | 100  |
| <b>By Age</b>               |      |      |      |      |      |      |      |      |      |      |      |      |      |
| 65-74 years                 | 66   | 72   | 81   | 82   | 84   | 83   | 84   | 84   | 83   | 79   | 74   | 73   | 68   |
| 75-84 years                 | 114  | 128  | 142  | 149  | 151  | 152  | 158  | 158  | 161  | 156  | 150  | 146  | 134  |
| ≥85 years                   | 120  | 134  | 149  | 151  | 155  | 160  | 166  | 165  | 168  | 171  | 164  | 164  | 146  |
| <b>By Sex</b>               |      |      |      |      |      |      |      |      |      |      |      |      |      |
| Female                      | 93   | 105  | 116  | 119  | 121  | 121  | 124  | 123  | 123  | 120  | 112  | 111  | 101  |
| Male                        | 84   | 91   | 103  | 107  | 110  | 111  | 115  | 116  | 119  | 114  | 110  | 107  | 98   |
| <b>By Race</b>              |      |      |      |      |      |      |      |      |      |      |      |      |      |
| White                       | 71   | 79   | 88   | 89   | 92   | 91   | 94   | 94   | 94   | 93   | 88   | 85   | 79   |
| Black                       | 272  | 297  | 326  | 340  | 339  | 346  | 354  | 354  | 361  | 341  | 324  | 322  | 292  |
| Other                       | 121  | 147  | 166  | 181  | 182  | 191  | 198  | 196  | 193  | 181  | 160  | 163  | 136  |
